# Supplementary material for: LPS Counter Regulates RNA Expression of Extracellular Proteases and Their Inhibitors in Murine Macrophages
Source: Hindawi journal article supplement (doi:10.1155/2012/157894), 2012-01-01
Supplement: f1 [file 157894.f1.pdf]

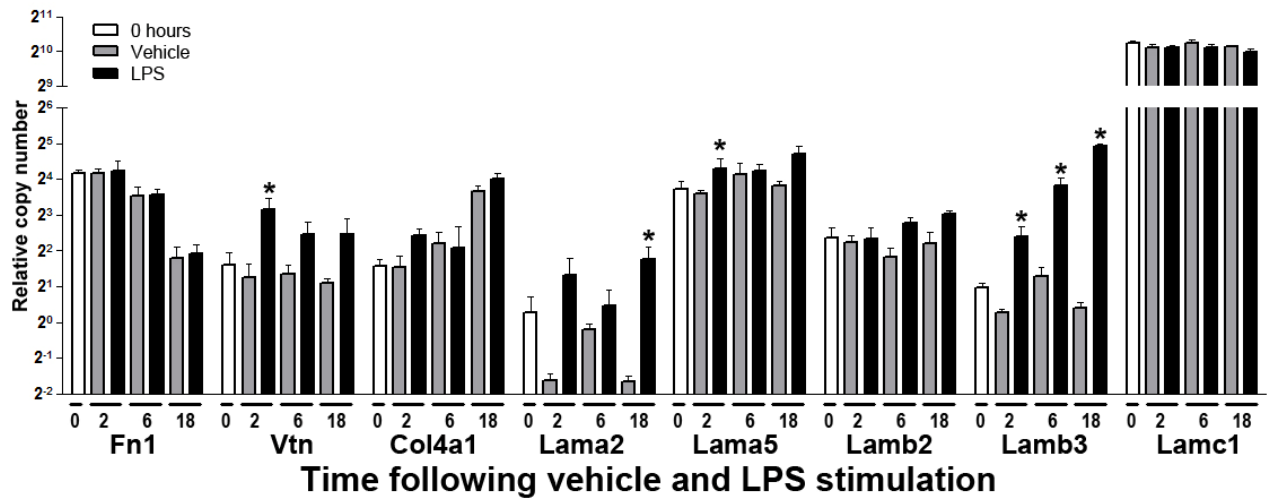

**Figure S1. Relative expression levels of genes encoding ECM components**

Most of the investigated genes related to ECM production were found not to be expressed by macrophages. However, of those that were, a few were also upregulated following LPS stimulation.
