# Supplementary material for: LPS Counter Regulates RNA Expression of Extracellular Proteases and Their Inhibitors in Murine Macrophages
Source: Hindawi journal article supplement (doi:10.1155/2012/157894), 2012-01-01
Supplement: f2 [file 157894.f2.pdf]

| Cytokines              | MMPs  | MMP inhibitors             | ECM     |
|------------------------|-------|----------------------------|---------|
| Il1b                   | Mmp2  | Timp1                      | Fga     |
| Il10                   | Mmp3  | Timp2                      | Fgb     |
| Il6                    | Mmp7  | Timp3                      | Fgg     |
| Tnf                    | Mmp8  | Timp4                      | Fn1     |
| Tgfb1                  | Mmp9  | <b>Other proteases</b>     | Vtn     |
| Tgfb2                  | Mmp10 | Tmprss6                    | Col11a1 |
| Tgfb3                  | Mmp11 | Tmprss7                    | Col1a1  |
| <b>Reference genes</b> | Mmp12 | Mcpt4                      | Col2a1  |
| Ywhaz                  | Mmp13 | Ctsg                       | Col3a1  |
| Tbp                    | Mmp14 | Elane                      | Col4a1  |
| Gapdh                  | Mmp15 | Hgfac                      | Col5a1  |
| Rn18s                  | Mmp19 | Prss8                      | Lama1   |
| <b>PA-system</b>       | Mmp21 | Tpsb2                      | Lama2   |
| Plat                   | Mmp23 | St14                       | Lama4   |
| Plau                   | Mmp24 | <b>Protease inhibitors</b> | Lama5   |
| Plaur                  | Mmp25 | Spint1                     | Lamb1-1 |
| Plg                    | Mmp27 | Spint2                     | Lamb2   |
| Serpinb2               | Mmp28 |                            | Lamb3   |
| Serpine1               |       |                            | Lamc1   |
| Serpinf2               |       |                            | Lamc2   |
| A2m                    |       |                            | Lamc3   |

**Table S1. qPCR array setup**

Primer pairs specific for the listed genes were included on the StellarRay™.
