# Supplementary material for: LPS Counter Regulates RNA Expression of Extracellular Proteases and Their Inhibitors in Murine Macrophages
Source: Hindawi journal article supplement (doi:10.1155/2012/157894), 2012-01-01
Supplement: f3 [file 157894.f3.pdf]

Expression normalized to DNA X 1000

| MMPs      | Ctrl    | Vehicle |         |          |         | LPS     |          |  |
|-----------|---------|---------|---------|----------|---------|---------|----------|--|
| Gene name | 0 hours | 2 hours | 6 hours | 18 hours | 2 hours | 6 hours | 18 hours |  |
| Mmp2      | 32      | 27      | 29      | 36       | 47      | 47      | 62       |  |
| Mmp3      | ND      | ND      | ND      | ND       | 3.2     | 4.1     | 6.7      |  |
| Mmp7      | ND      | ND      | ND      | ND       | 2.6     | 2.4     | 2.7      |  |
| Mmp8      | 31      | 31      | 22      | 23       | 35      | 27      | 44       |  |
| Mmp9      | 889     | 822     | 601     | 371      | 929     | 904     | 1770     |  |
| Mmp10     | 90      | 100     | 95      | 68       | 194     | 232     | 70       |  |
| Mmp12     | 21094   | 25928   | 33442   | 38757    | 37947   | 56157   | 61261    |  |
| Mmp13     | 562     | 610     | 546     | 272      | 1313    | 2264    | 1029     |  |
| Mmp14     | ND      | ND      | ND      | ND       | 10.3    | 12.8    | 5.9      |  |
| Mmp15     | 5.2     | 3.9     | 2.8     | 2.7      | 4.7     | 7.5     | 6.0      |  |
| Mmp19     | 27      | 33      | 36      | 49       | 27      | 22      | 48       |  |
| Mmp21     | 2.6     | 2.7     | 2.7     | 3.5      | 5.1     | 5.4     | 5.1      |  |
| Mmp23     | 7.9     | 10.0    | 8.0     | 8.8      | 13.1    | 6.3     | 7.7      |  |
| Mmp24     | 7.1     | 4.3     | 7.2     | 4.1      | 7.1     | 6.6     | 7.5      |  |
| Mmp25     | 4.3     | 4.6     | 3.9     | 5.5      | 10.5    | 30.9    | 14.6     |  |
| Mmp27     | 20      | 17      | 15      | 8        | 21      | 17      | 18       |  |
| Mmp28     | 2.2     | 0.9     | 2.8     | 1.7      | 4.6     | 4.8     | 4.9      |  |

Cytokines

|       |      |      |      |      |       |       |       |
|-------|------|------|------|------|-------|-------|-------|
| Il10  | 11.5 | 9.5  | 7.2  | 7.9  | 16.6  | 13.2  | 12.1  |
| Il1b  | 13.1 | 4.5  | 3.3  | 6.0  | 1329  | 2871  | 1028  |
| Il6   | 4.3  | 6.1  | 2.1  | 5.3  | 20    | 895   | 1787  |
| Tnf   | 3367 | 2772 | 2936 | 3469 | 66111 | 45559 | 16787 |
| Tgfb1 | 5889 | 5554 | 5423 | 4175 | 6238  | 5647  | 4300  |
| Tgfb2 | 5.2  | 3.8  | 3.2  | 3.7  | 7.5   | 8.8   | 8.5   |
| Tgfb3 | 67   | 57   | 60   | 57   | 66    | 42    | 28    |

PA-system

|          |      |      |      |      |      |      |      |
|----------|------|------|------|------|------|------|------|
| Plat     | 7.8  | 7.9  | 14.6 | 13.8 | 13.6 | 4.3  | 7.2  |
| Plau     | 3607 | 3834 | 2861 | 2913 | 4598 | 847  | 941  |
| Plaur    | 3961 | 3474 | 3181 | 4703 | 5937 | 7046 | 8504 |
| Serpib2  | ND   | ND   | ND   | ND   | 8.9  | 11.4 | 31.6 |
| Serpine1 | 10   | 13   | 21   | 33   | 239  | 272  | 75   |
| Serpinf2 | ND   | 2.7  | ND   | 3.3  | ND   | 5.2  | 5.7  |
| A2m      | 1.6  | 0.7  | 1.9  | 0.6  | 4.5  | 3.0  | 5.1  |

MMP inhibitors

|       |      |      |      |      |      |      |      |
|-------|------|------|------|------|------|------|------|
| Timp1 | 27   | 25   | 35   | 39   | 26   | 27   | 27   |
| Timp2 | 3452 | 3502 | 3466 | 2776 | 3592 | 2147 | 1230 |
| Timp4 | 3.4  | 2.6  | ND   | 4.7  | 7.2  | 4.6  | 3.4  |

ECM

|        |      |      |      |      |      |      |      |
|--------|------|------|------|------|------|------|------|
| Fn1    | 18.0 | 18.0 | 11.6 | 3.5  | 18.9 | 11.8 | ND   |
| Vtn    | 3.1  | 2.4  | ND   | 2.1  | 9.0  | 5.5  | 5.6  |
| Col4a1 | ND   | 2.9  | ND   | 12.8 | 5.4  | ND   | 16.1 |
| Lama2  | 1.2  | ND   | 0.9  | ND   | 2.5  | 1.4  | 3.4  |
| Lama5  | 13.2 | 12.2 | 17.5 | 14.1 | 19.8 | 18.8 | 26.3 |
| Lamb2  | 5.2  | 4.7  | 3.5  | 4.6  | 5.1  | 6.9  | 8.2  |
| Lamb3  | ND   | ND   | ND   | ND   | 5.2  | 14.3 | 30.4 |
| Lamc1  | 1207 | 1105 | 1226 | 1128 | 1113 | 1108 | 1016 |

Other proteases

|         |      |      |      |      |      |     |      |
|---------|------|------|------|------|------|-----|------|
| Tmprss6 | 5.2  | 4.2  | 6.0  | 3.1  | 9.6  | 6.2 | 6.8  |
| Mcpt4   | ND   | ND   | ND   | ND   | 1.8  | ND  | 2.1  |
| Prss8   | 13.5 | 14.6 | 14.6 | 17.7 | 15.0 | 9.9 | 18.2 |
| St14    | 1258 | 1375 | 1370 | 1405 | 1197 | 800 | 628  |

**Table S2. Relative expression levels of analyzed genes**

Gene expression levels were normalized to DNA as described thus allowing intergenic comparison.
