# Supplementary material for: LPS Counter Regulates RNA Expression of Extracellular Proteases and Their Inhibitors in Murine Macrophages
Source: Hindawi journal article supplement (doi:10.1155/2012/157894), 2012-01-01
Supplement: f4 [file 157894.f4.pdf]

| Name                        | 2 hours |         | 6 hours |         | 18 hours |         |
|-----------------------------|---------|---------|---------|---------|----------|---------|
|                             | Fold    | p-value | Fold    | p-value | Fold     | p-value |
| <b>Cytokines</b>            |         |         |         |         |          |         |
| Il10                        | 1.6     | 0.1036  | 1.4     | 0.0219  | 0.9      | 0.0471  |
| Il1b                        | 270.2   | 0.0000  | 643.5   | 0.0000  | 94.0     | 0.0004  |
| Il6                         | 2.2     | 0.1195  | 306.2   | 0.0000  | 198.9    | 0.0003  |
| Tnf                         | 21.7    | 0.0000  | 11.5    | 0.0000  | 2.7      | 0.0009  |
| Tgfb1                       | 1.0     | 0.5208  | 0.8     | 0.0323  | 0.6      | 0.0240  |
| Tgfb2                       | 1.7     | 0.0216  | 2.2     | 0.0221  | 1.3      | 0.1709  |
| Tefb3                       | 0.8     | 0.2853  | 0.5     | 0.0092  | 0.3      | 0.0032  |
| <b>Reference genes</b>      |         |         |         |         |          |         |
| Ywhaz                       | 0.9     | 0.2593  | 0.8     | 0.0134  | 0.5      | 0.0093  |
| Tbp                         | 0.9     | 0.3524  | 0.8     | 0.0128  | 0.5      | 0.0125  |
| Gapdh                       | 0.9     | 0.4441  | 0.7     | 0.0077  | 0.7      | 0.0183  |
| Rn18s                       | 0.8     | 0.3396  | 0.6     | 0.0330  | 0.7      | 0.0325  |
| <b>PA-system</b>            |         |         |         |         |          |         |
| Plat                        | 1.1     | 0.2822  | 0.2     | 0.0018  | 0.3      | 0.0145  |
| Plau                        | 1.1     | 0.5212  | 0.2     | 0.0001  | 0.2      | 0.0003  |
| Plaur                       | 1.5     | 0.0470  | 1.7     | 0.0016  | 1.0      | 0.0122  |
| Serpnb2                     | ND      | 0.0115  | ND      | 0.0042  | ND       | 0.0001  |
| Serpine1                    | 16.9    | 0.0003  | 9.5     | 0.0003  | 1.3      | 0.0279  |
| Serpinf2                    | ND      | 0.3741  | ND      | 0.0064  | 1.0      | 0.1200  |
| A2m                         | 5.3     | 0.0142  | 1.2     | ND      | 5.0      | 0.0057  |
| <b>Extracellular matrix</b> |         |         |         |         |          |         |
| Fn1                         | 0.7     | 0.3193  | 0.8     | 0.0729  | ND       | 0.1305  |
| Vtn                         | 3.3     | 0.0283  | ND      | 0.0334  | 1.4      | 0.1807  |
| Col4a1                      | 1.2     | 0.1932  | ND      | ND      | 0.7      | 0.0309  |
| Lama2                       | ND      | 0.0565  | 1.1     | ND      | ND       | 0.0302  |
| Lama5                       | 1.1     | 0.2423  | 0.8     | 0.0615  | 1.1      | 0.0554  |
| Lamb2                       | 0.7     | 0.3647  | 1.5     | 0.0224  | 1.0      | 0.0880  |
| Lamb3                       | ND      | 0.0072  | ND      | 0.0023  | ND       | 0.0001  |
| Lamc1                       | 0.7     | 0.2474  | 0.7     | 0.0159  | 0.5      | 0.0172  |

| Name                      | 2 hours |         | 6 hours |         | 18 hours |         |
|---------------------------|---------|---------|---------|---------|----------|---------|
|                           | Fold    | p-value | Fold    | p-value | Fold     | p-value |
| <b>MMPs</b>               |         |         |         |         |          |         |
| Mmp2                      | 1.6     | 0.0638  | 1.2     | 0.0054  | 5.0      | 0.0320  |
| Mmp3                      | ND      | 0.0168  | ND      | 0.0077  | ND       | 0.0243  |
| Mmp7                      | ND      | 0.1103  | ND      | ND      | ND       | ND      |
| Mmp8                      | 1.0     | 0.4618  | 0.9     | 0.0075  | 1.0      | 0.0165  |
| Mmp9                      | 1.0     | 0.5390  | 1.1     | 0.0098  | 2.6      | 0.0007  |
| Mmp10                     | 1.8     | 0.0262  | 1.8     | 0.0024  | 0.6      | 0.0267  |
| Mmp12                     | 1.3     | 0.1119  | 1.2     | 0.0099  | -1.1     | 0.0419  |
| Mmp13                     | 1.9     | 0.0081  | 3.1     | 0.0004  | 2.1      | 0.0024  |
| Mmp14                     | ND      | 0.0003  | ND      | 0.0022  | ND       | ND      |
| Mmp15                     | 0.7     | 0.5086  | 2.0     | 0.0038  | 1.2      | 0.1824  |
| Mmp19                     | 0.7     | 0.0884  | 0.4     | 0.0038  | 0.5      | 0.0342  |
| Mmp21                     | 1.3     | 0.1705  | 1.6     | 0.0240  | 0.9      | 0.2316  |
| Mmp23                     | 0.9     | 0.2835  | 0.6     | 0.0328  | 0.5      | 0.0691  |
| Mmp24                     | 1.1     | 0.3804  | 0.7     | 0.1875  | 1.0      | 0.1279  |
| Mmp25                     | 2.0     | 0.0162  | 5.8     | 0.0023  | 1.4      | 0.0067  |
| Mmp27                     | 0.9     | 0.3145  | 0.8     | 0.0136  | 1.2      | 0.0312  |
| Mmp28                     | 4.6     | 0.0009  | 1.3     | 0.0999  | 1.6      | 0.0291  |
| <b>Inhibitors of MMPs</b> |         |         |         |         |          |         |
| Timp1                     | 0.7     | 0.2266  | 0.6     | 0.0090  | 0.4      | 0.0275  |
| Timp2                     | 0.7     | 0.2299  | 0.5     | 0.0028  | 0.2      | 0.0013  |
| Timp4                     | 1.9     | 0.1254  | ND      | 0.1181  | 0.4      | 0.0867  |
| <b>Other proteases</b>    |         |         |         |         |          |         |
| Tmprss6                   | 1.5     | 0.1704  | 0.8     | 0.0509  | 1.2      | 0.1996  |
| Mcpt4                     | ND      | 0.0010  | ND      | 0.0049  | ND       | 0.0344  |
| Prss8                     | 0.9     | 0.4646  | 0.5     | 0.0226  | 0.6      | 0.0294  |
| St14                      | 0.8     | 0.1008  | 0.4     | 0.0034  | 0.2      | 0.0011  |

**Table S3. GPR fold change values and GPR p-values of array data**

Gene expression in LPS and vehicle stimulated RAW 264.7 cultures was analyzed after 2, 6, and 18 hours. The GPR fold change (Fold) is presented and GPR p-values (p-value) are highlighted in red when below 0.05. The GPR fold change values are provided in this table to indicate how the gene is regulated, but it should be stressed that the GPR p-values are not directly linked to the fold change values.
